# Supplementary material for: Construction of cationic covalent organic framework for efficient gold extraction
Source: Royal Society of Chemistry journal article supplement (doi:10.1039/d4cc03303e), 2024-01-01
Supplement: d4cc03303e2.pdf [file d4cc03303e2.pdf]

## Supporting Information

### **Construction of cationic covalent organic framework for efficient gold extraction**

Yequan Jiang,<sup>a</sup> Jie Liu,<sup>a</sup> Zhengcheng Huang,<sup>a</sup> Jianqiang Li<sup>a,b\*</sup> and Feng Luo<sup>a\*</sup>

<sup>a</sup>School of Chemistry and Material Science, East China University of Technology, Nanchang, Jiangxi 344000, China

<sup>b</sup>Jiang Xi Zheng Pu Yi He Technology Co.Ltd., Nanchang, Jiangxi 344000, China.

Corresponding author: [ecitluofeng@163.com](mailto:ecitluofeng@163.com) and [jqli@ecut.edu.cn](mailto:jqli@ecut.edu.cn)

---

## EXPERMENTS

### 1. Materials and general methods

All the organic monomers and ligand were purchased from Jilin Chinese Academy of Sciences -Yanshen Technology Co., Ltd. Others were purchased from Adamas Reagent, Ltd. and used as received without further purification. X-ray powder diffraction was collected by a Bruker AXSD8 Discover powder diffractometer at 40 kV, 40 mA for Cu K $\lambda$  ( $\lambda$ = 1.5406 Å). The simulated powder patterns were calculated by Mercury 1.4. Infrared Spectra (IR) were measured by a Bruker VERTEX70 spectrometer in the 500-4000 cm<sup>-1</sup> region. The gas adsorption isotherms were collected on a Belsorp-max. Ultrahigh-purity-grade (>99.999%) N<sub>2</sub> gases were used during the adsorption measurement. SEM and EDS measurements were carried out using a Hitachi S-4800 microscope. The analyses of concentrations of metal ions in the solution was carried out by ThermoFisher iCap7600 ICP-OES instruments. X-ray photoelectron spectra (XPS) were collected by Thermo Scientific ESCALAB 250 Xi spectrometer. Solid-state NMR experiments were performed on Varian Infinityplus 300 solid-state NMR spectrometer (300MHz).

### 2. Synthesis of ECUT-iCOF-5

2-Chloro-1,3-dimethylimidazolium Tetrafluoroborate (CIB) (0.3 mmol, 33.06 mg), 1,3,5-Tris(p-formylphenyl)benzene (0.2 mmol, 39.04 mg), benzoic anhydride (2.2 mmol, 500 mg) and zinc acetate (0.8 mmol, 150 mg) were weighed into a Pyrex tube. Then the tube was placed in a 190 °C for 3 days. After cooling to room temperature, the precipitated was washed with a large number of DMF and then methanol. The resulting powder was collected by filtration and dried at 80°C under vacuum overnight to afford reddish brown crystallites in 80% yield for ECUT-iCOF-5.

### 3. Structural simulation

The theoretical framework of ECUT-iCOF-5 is created by repeating the unit of the monomer molecules. The geometrical structure is optimized by using the Forcite Plus module and the Universal force field in Material Studio 5.5 from Accelrys. Subsequently, Pawley refinement on the experimental PXRD data is carried out to obtain the exact structure of ECUT-iCOF-5.

### 4. Photocatalytic reduction of gold (Au<sup>3+</sup>)

Au<sup>3+</sup> solution was prepared by dissolving NaAuCl<sub>4</sub>·2H<sub>2</sub>O in deionized water. Adsorption temperature is 298 K. Visible light was perpendicularly irradiated on the reaction vessel from a 350W Xe lamp with  $\lambda$ >400 nm.

In kinetics experiments, the Au solution with initial concentration of 100 ppm was used. The dose of adsorbent is 5 mg, while the Au solution is 50 mL. In addition, add 5 mL methanol solution and the contact time is 1.5 h.

In selective adsorption experiments, a 6 cation ions mixed solution contains both Au and other

5 metal ions with respectively initial concentration of 10mg/L were used. In the same condition, we just changed the cation ions into anion ions, and the anions were separated for experiments. The dose of adsorbent is 5 mg, while the solution is 50 mL. In addition, add 5 mL methanol solution and the contact time is 1.5 h.

The adsorption amount,  $Q_e$  (mg/g), was calculated by the difference of Au equilibrium concentration before and after adsorption (see equation 1):

$$Q_e = \frac{(C_0 - C_e) \times V}{m} \quad S1$$

Where  $C_0$  (mg/L) and  $C_e$  (mg/L) are the initial concentration and equilibrium concentration of uranium in the solutions, respectively;  $V$  (mL) is the volume of testing solution and  $m$  (mg) is the amount of sorbent.

## 5. Adsorption kinetics modeling and analysis

The fitting formula of quasi-first-order kinetic model:

$$\ln(q_e - q_t) = \ln q_e - \frac{k_1 t}{2.303} \quad S2$$

Where  $t$  (min) means reaction time;  $q_e$  ( $\text{mg} \cdot \text{g}^{-1}$ ) means adsorption capacity of uranium at adsorption equilibrium;  $q_t$  ( $\text{mg} \cdot \text{g}^{-1}$ ) means adsorption capacity of uranium at time  $t$ ;  $k_1$  ( $\text{min}^{-1}$ ) means adsorption rate constant of quasi-first-order kinetic mode.

The fitting formula of quasi-second-order kinetic model:

$$\frac{t}{q_t} = \frac{1}{k_2 q_e^2} + \frac{t}{q_e} \quad S3$$

where  $t$  (min) means reaction time;  $q_e$  ( $\text{mg} \cdot \text{g}^{-1}$ ) means the adsorption capacity of uranium at adsorption equilibrium;  $q_t$  ( $\text{mg} \cdot \text{g}^{-1}$ ) means the adsorption capacity of uranium at time  $t$ ;  $k_2$  ( $\text{min}^{-1}$ ) means the adsorption rate constant in the quasi-second-order kinetic model.

Langmuir isotherm model:

$$\frac{C_e}{q_e} = \frac{1}{q_m K_L} + \frac{C_e}{q_m} \quad S4$$

where  $C_e$  ( $\text{mg} \cdot \text{L}^{-1}$ ) means the mass concentration of uranium in solution at equilibrium;  $q_e$  ( $\text{mg} \cdot \text{g}^{-1}$ ) means the adsorption capacity of uranium at adsorption equilibrium;  $q_m$  ( $\text{mg} \cdot \text{g}^{-1}$ ) means the maximum adsorption capacity of uranium;  $K_L$  ( $\text{L} \cdot \text{mg}^{-1}$ ) means the constant related to adsorption, the greater the value, the greater the adsorption affinity.

Freundlich isotherm model:

---

$$\ln q_e = \ln K_F - \frac{1}{n} \ln C_e \quad S5$$

where  $C_e$  ( $\text{mg}\cdot\text{L}^{-1}$ ) means mass concentration of uranium in solution at equilibrium;  $q_e$  ( $\text{mg}\cdot\text{g}^{-1}$ ) means adsorption capacity of uranium at adsorption equilibrium;  $K_F$  ( $\text{mg}\cdot\text{g}^{-1}$ ) means constant related to adsorption;  $n$  means parameter related to adsorption strength.

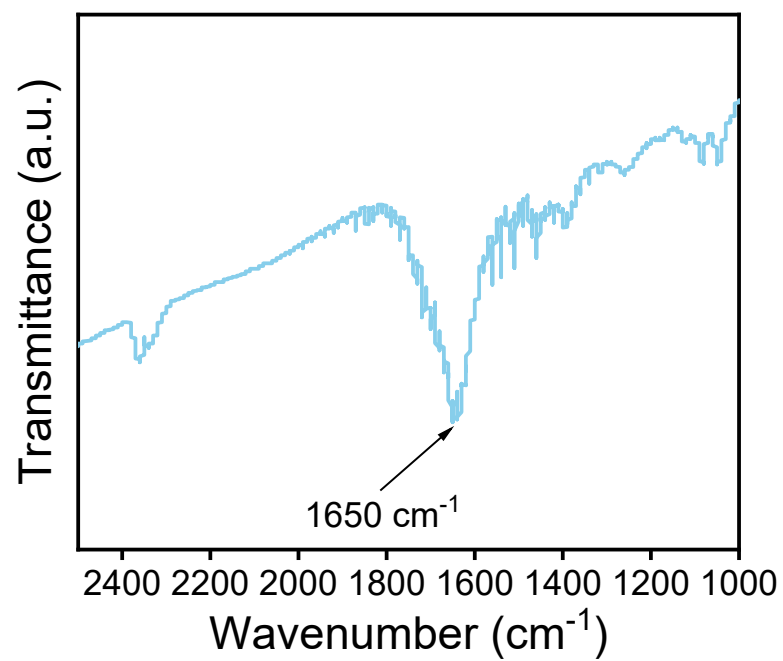

**Fig. S1** FT-IR spectra of ECUT-iCOF-5.

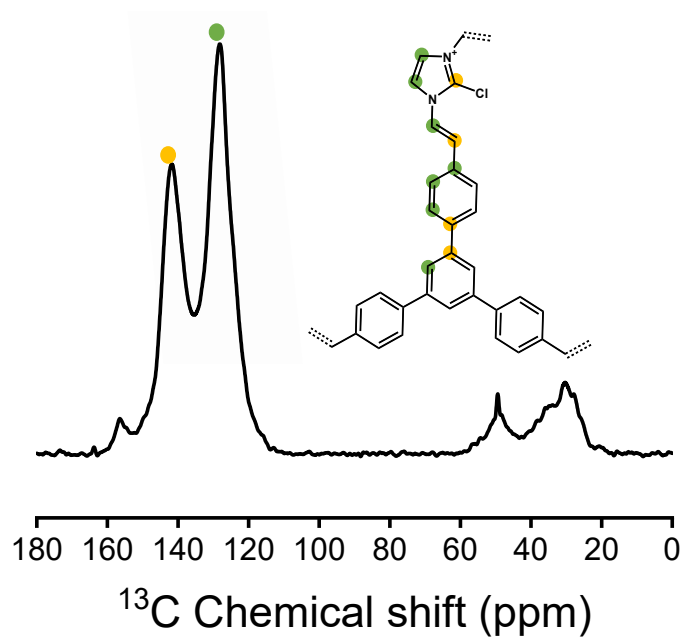

**Fig. S2** Solid-state  $^{13}\text{C}$  NMR of ECUT-iCOF-5 with the assignment.

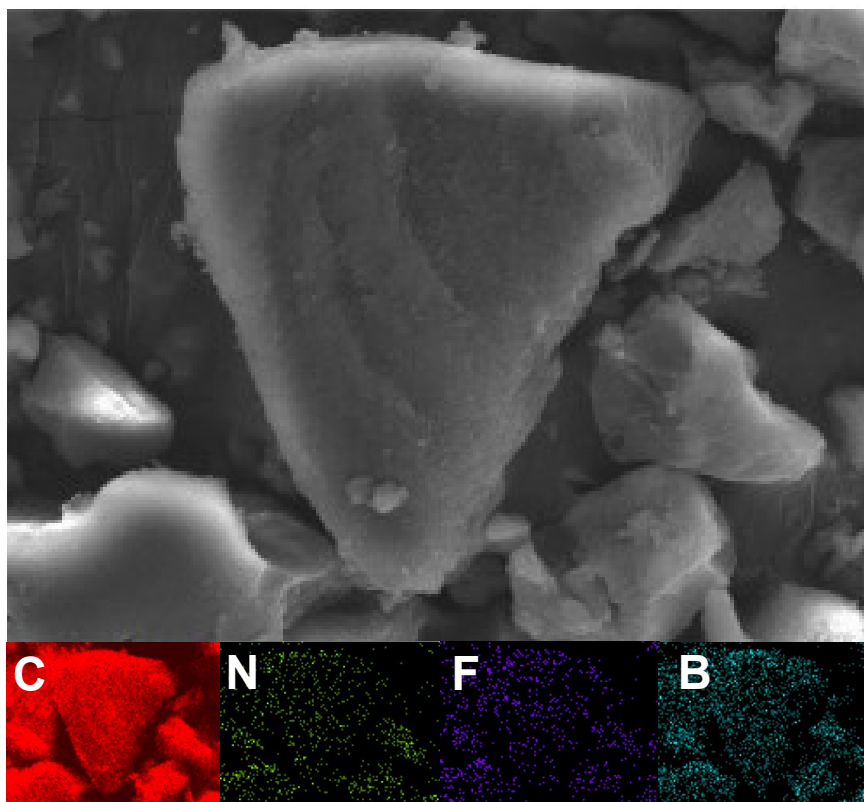

**Fig. S3** The SEM-EDS image of C, N, F, B element in ECUT-iCOF-5.

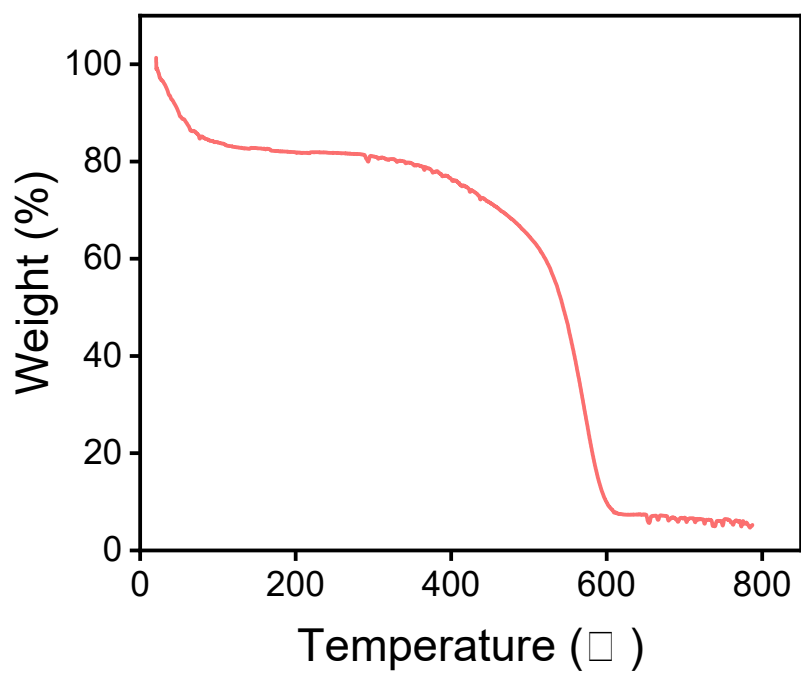

**Fig. S4** TG curve of ECUT-iCOF-5.



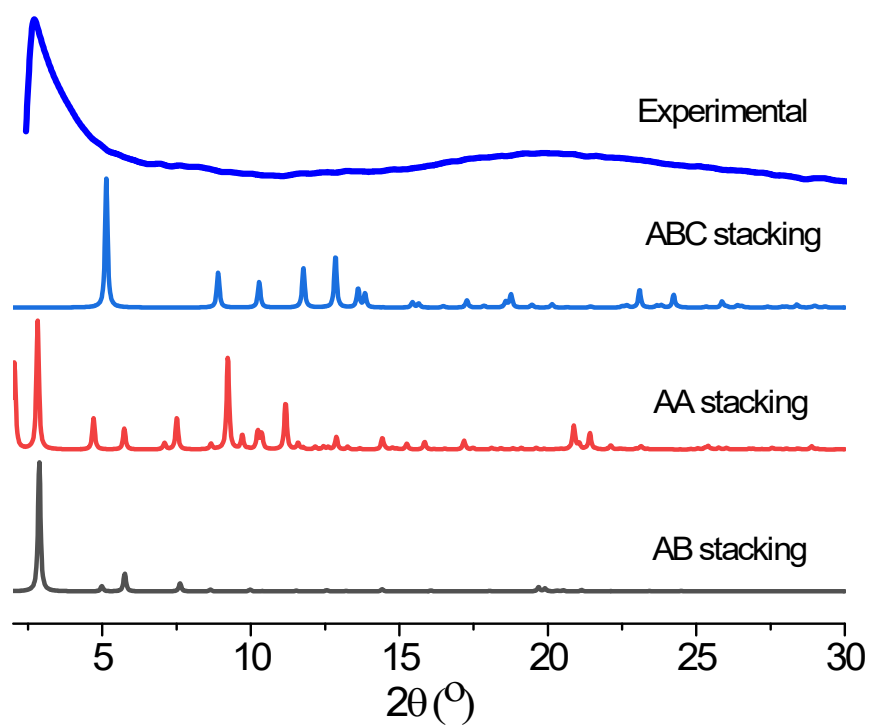

**Fig. S5** A comparison of PXRD patterns among the experimental value and the calculated values of AA, AB, and ABC stacking.

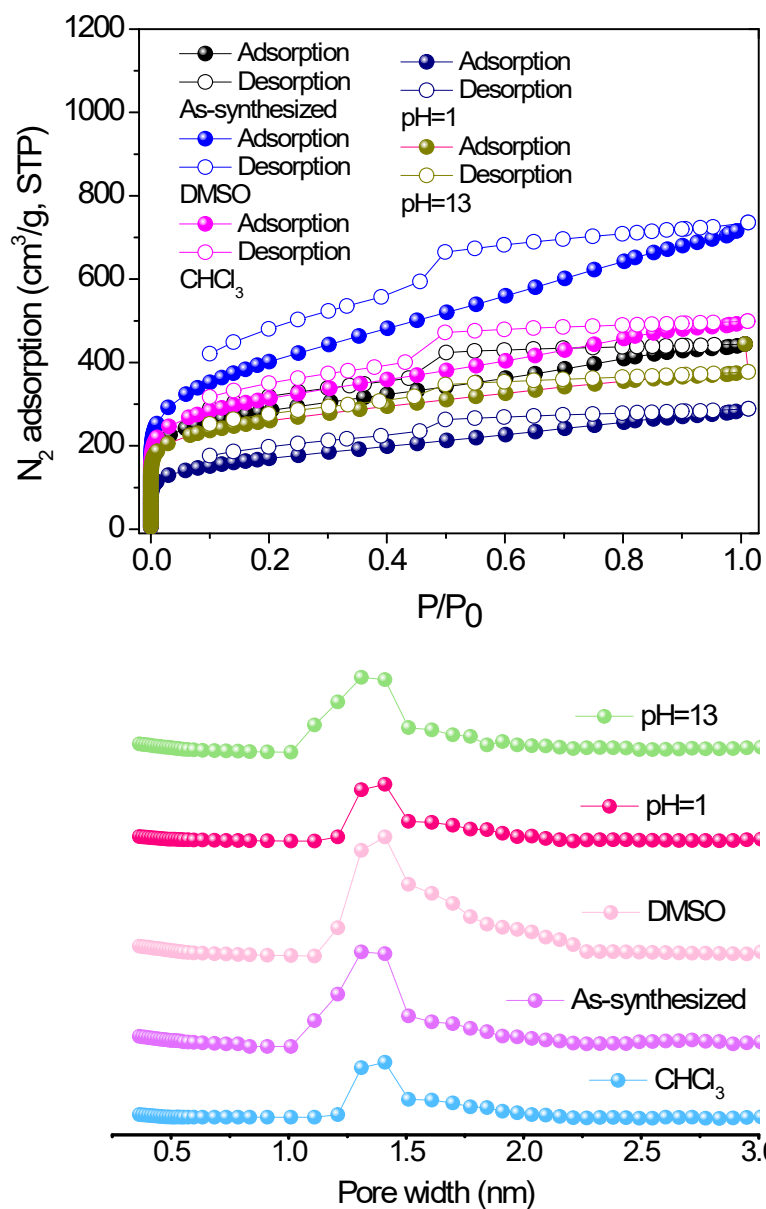

**Fig. S6** A comparison in  $N_2$  adsorption at 77 K and its aperture distribution among these samples in water at pH=1 (BET=600 m<sup>2</sup>/g) and 13 (BET=936 m<sup>2</sup>/g) or in organic solvents such as DMSO (BET=1411 m<sup>2</sup>/g) and trichloromethane (BET=1117 m<sup>2</sup>/g) for 24 hours.

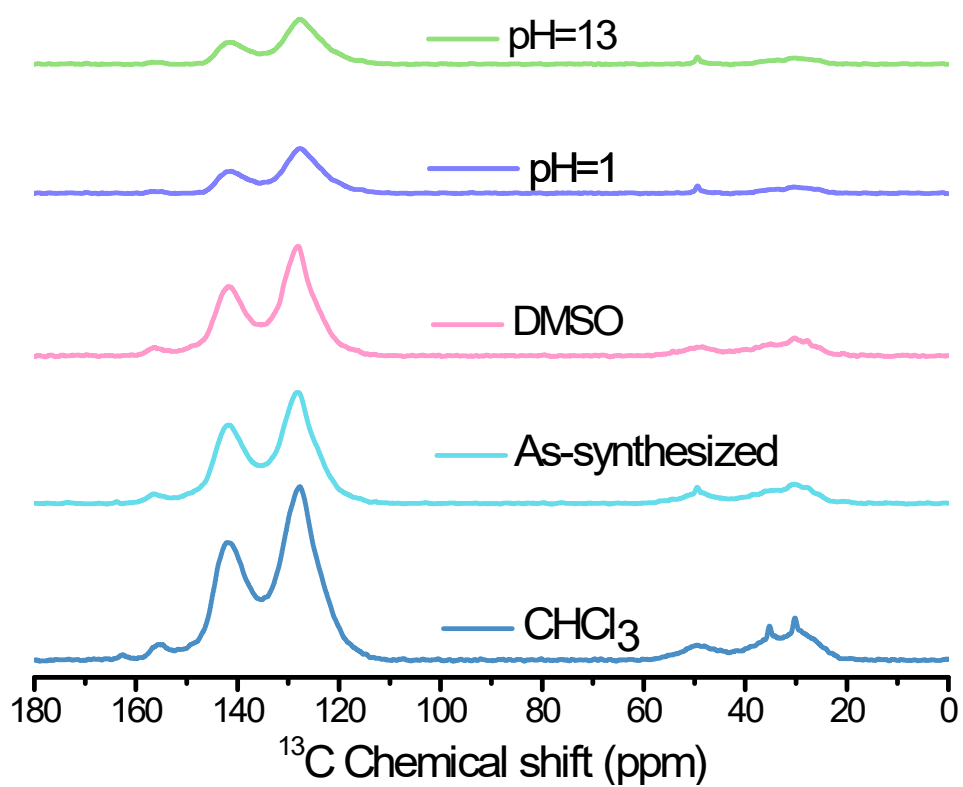

**Fig. S7** A comparison of solid-state  $^{13}\text{C}$  NMR spectrum among the samples soaking in water at pH=1 and 13 or in organic solvents such as DMSO and trichloromethane for 24 hours.

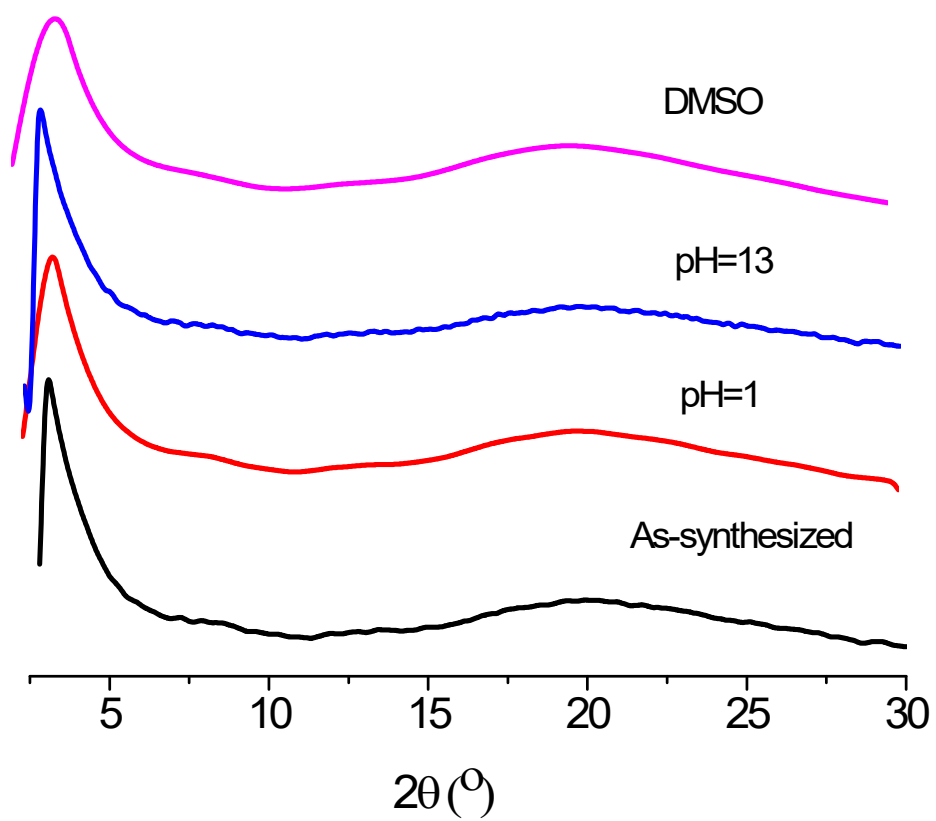

**Fig. S8** A comparison of PXRD among the samples soaking in water at pH=1 and 13 or in DMSO for 24 hours.

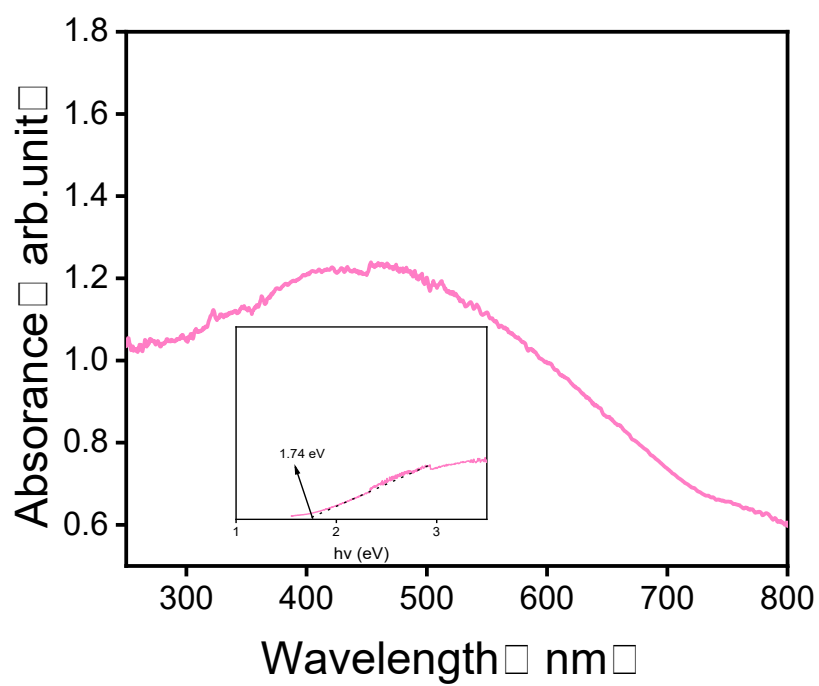

**Fig. S9** UV-vis diffuse reflection spectrum of ECUT-iCOF-5.

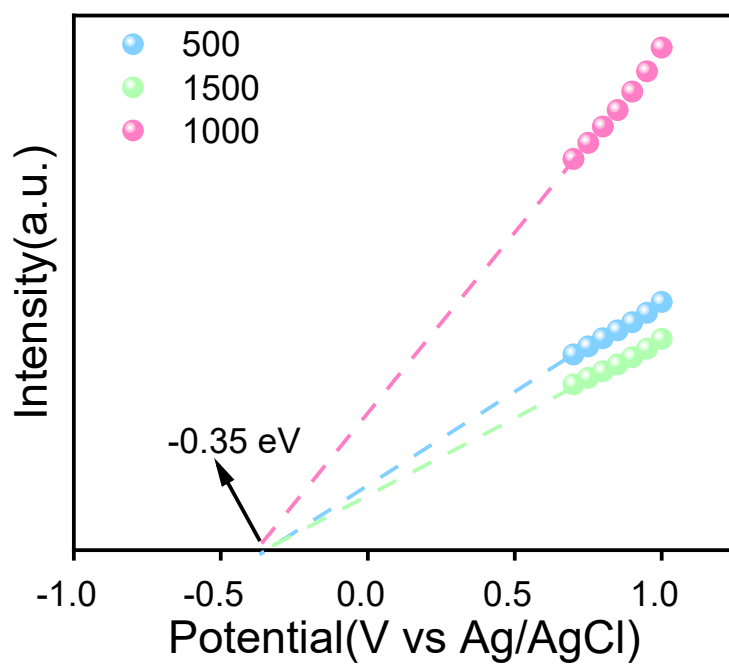

**Fig. S10** Mott-Schottky plots of ECUT-iCOF-5.

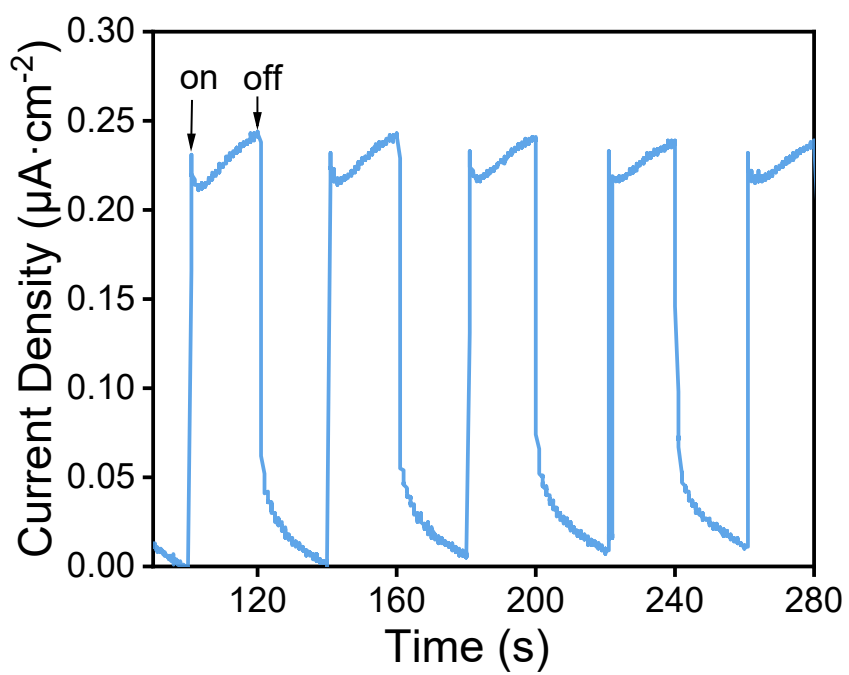

**Fig. S11** Transient photocurrent response.

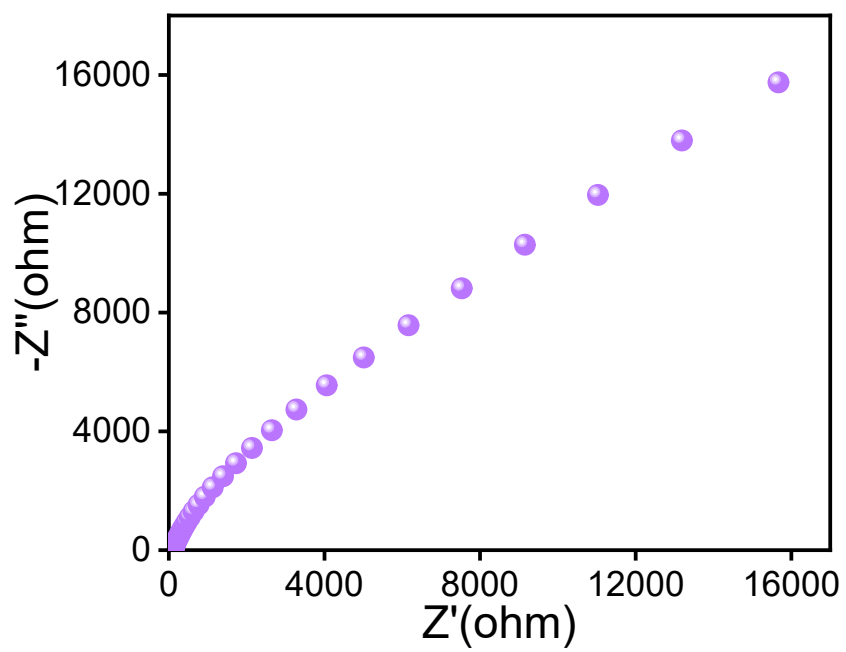

**Fig. S12** EIS Nyquist plots of ECUT-iCOF-5.



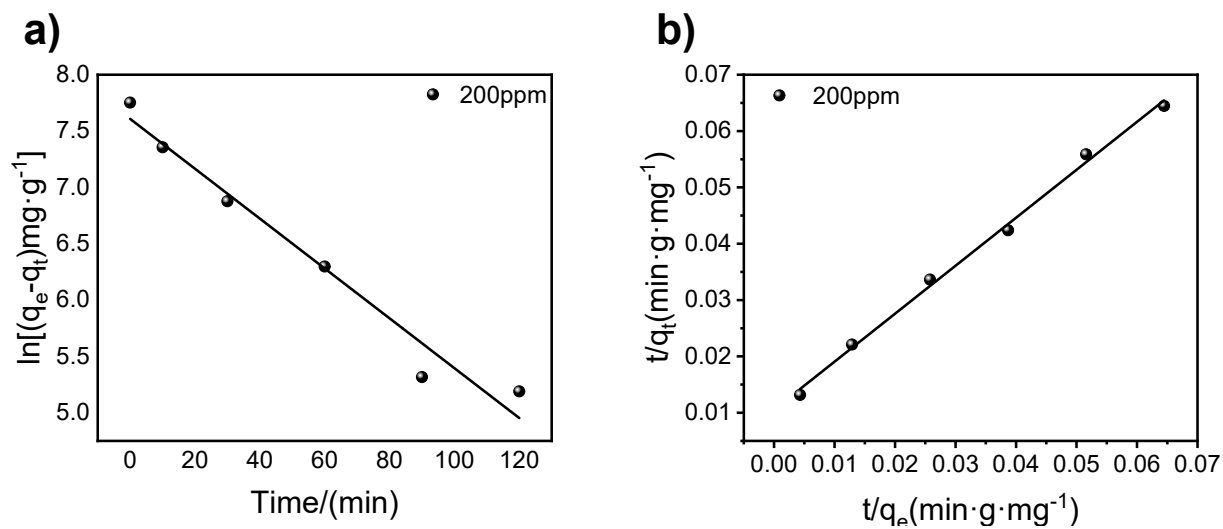

**Fig. S13** The a) pseudo-first-order and b) pseudo-second-order models for Au<sup>3+</sup> adsorption of ECUT-iCOF-5.

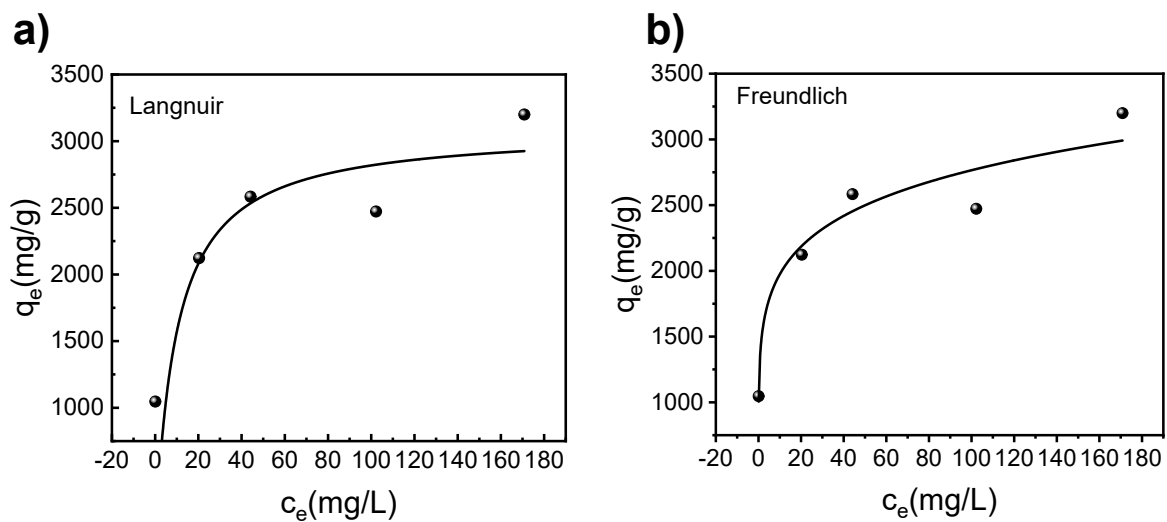

**Fig. S14** a) Langmuir adsorption isotherm model and b) Freundlich adsorption isotherm model for  $\text{Au}^{3+}$  adsorption of ECUT-iCOF-5.

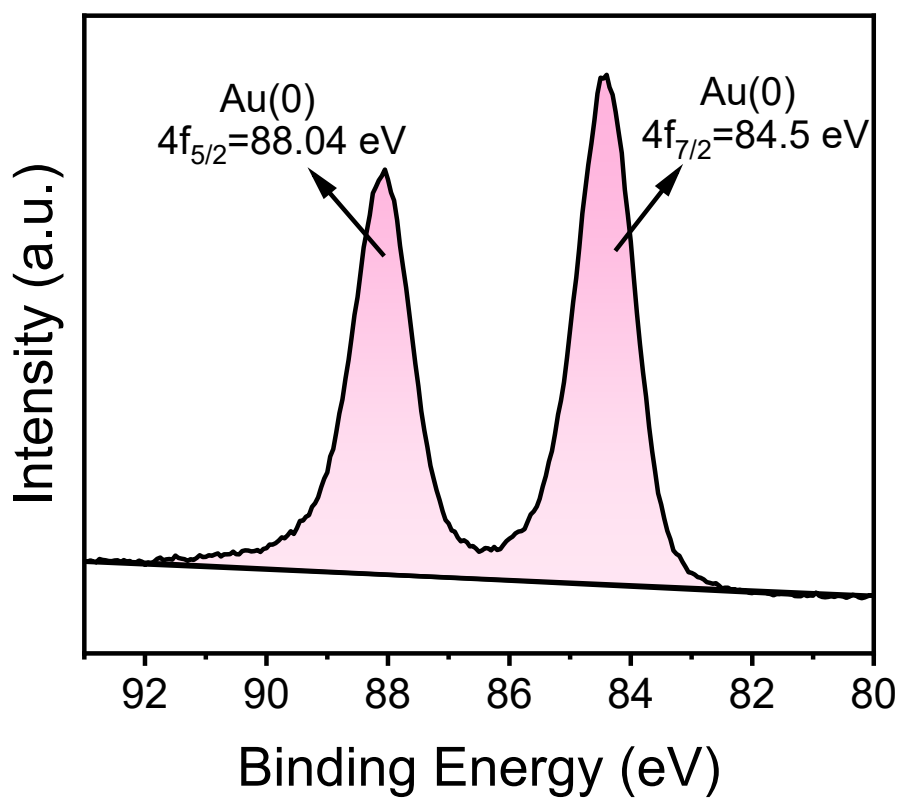

**Fig. S15** XPS spectra of Au element after photocatalysis.

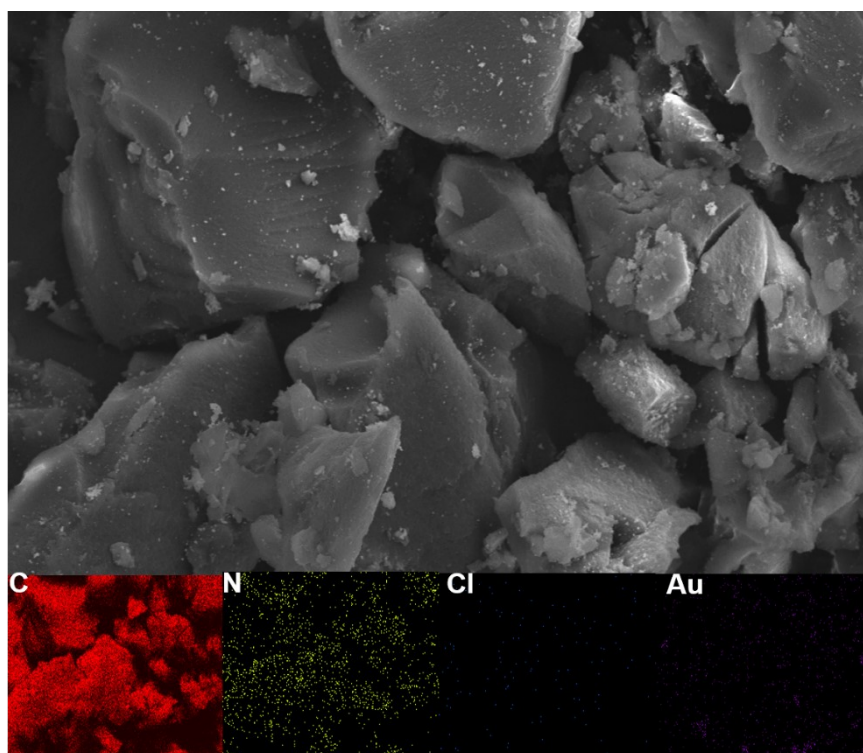

**Fig. S16** The SEM image and EDS of C, N, Cl, Au element in ECUT-iCOF-5 after gold extraction.

**Table S1.** Calculated drystallography data of CUT-iCOF-5.

|                                |                    |
|--------------------------------|--------------------|
| data_ECUT-iCOF-5=1             |                    |
| _audit_creation_date           | 2024-05-07         |
| _audit_creation_method         | 'Materials Studio' |
| _symmetry_space_group_name_H-M | 'P-6'              |
| _symmetry_Int_Tables_number    | 174                |
| _symmetry_cell_setting         | hexagonal          |
| loop_                          |                    |
| _symmetry_equiv_pos_as_xyz     |                    |
| x,y,z                          |                    |
| -y,x-y,z                       |                    |
| -x+y,-x,z                      |                    |
| x,y,-z                         |                    |
| -y,x-y,-z                      |                    |
| -x+y,-x,-z                     |                    |
| _cell_length_a                 | 35.0212            |
| _cell_length_b                 | 35.0212            |
| _cell_length_c                 | 7.4477             |
| _cell_angle_alpha              | 90.0000            |
| _cell_angle_beta               | 90.0000            |
| _cell_angle_gamma              | 120.0000           |
| loop_                          |                    |
| _atom_site_label               |                    |
| _atom_site_type_symbol         |                    |
| _atom_site_fract_x             |                    |
| _atom_site_fract_y             |                    |
| _atom_site_fract_z             |                    |
| _atom_site_U_iso_or_equiv      |                    |
| _atom_site_adp_type            |                    |

---

\_atom\_site\_occupancy

|     |   |         |         |         |         |      |      |
|-----|---|---------|---------|---------|---------|------|------|
| B1  | B | 0.40644 | 0.44625 | 0.20526 | 0.00000 | Uiso | 1.00 |
| F2  | F | 0.40642 | 0.44477 | 0.36158 | 0.00000 | Uiso | 1.00 |
| F3  | F | 0.43297 | 0.42993 | 0.14981 | 0.00000 | Uiso | 1.00 |
| F4  | F | 0.42322 | 0.48998 | 0.15847 | 0.00000 | Uiso | 1.00 |
| F5  | F | 0.36315 | 0.42022 | 0.15288 | 0.00000 | Uiso | 1.00 |
| F6  | F | 0.38125 | 0.54782 | 0.37111 | 0.00000 | Uiso | 1.00 |
| C7  | C | 0.95140 | 0.96428 | 0.50000 | 0.00000 | Uiso | 1.00 |
| C8  | C | 0.96475 | 0.01273 | 0.50000 | 0.00000 | Uiso | 1.00 |
| C9  | C | 0.86947 | 0.93931 | 0.50000 | 0.00000 | Uiso | 1.00 |
| C10 | C | 0.90287 | 0.92860 | 0.50000 | 0.00000 | Uiso | 1.00 |
| C11 | C | 0.88971 | 0.88376 | 0.50000 | 0.00000 | Uiso | 1.00 |
| C12 | C | 0.84570 | 0.85154 | 0.50000 | 0.00000 | Uiso | 1.00 |
| C13 | C | 0.81294 | 0.86284 | 0.50000 | 0.00000 | Uiso | 1.00 |
| C14 | C | 0.82560 | 0.90712 | 0.50000 | 0.00000 | Uiso | 1.00 |
| C15 | C | 0.76544 | 0.83055 | 0.50000 | 0.00000 | Uiso | 1.00 |
| N16 | N | 0.62815 | 0.71935 | 0.50000 | 0.00000 | Uiso | 1.00 |
| N17 | N | 0.70170 | 0.75548 | 0.50000 | 0.00000 | Uiso | 1.00 |
| C18 | C | 0.66510 | 0.75920 | 0.50000 | 0.00000 | Uiso | 1.00 |
| C19 | C | 0.74797 | 0.78703 | 0.50000 | 0.00000 | Uiso | 1.00 |
| C20 | C | 0.58199 | 0.70463 | 0.50000 | 0.00000 | Uiso | 1.00 |
| C21 | C | 0.36674 | 0.71125 | 0.50000 | 0.00000 | Uiso | 1.00 |
| C22 | C | 0.37968 | 0.67968 | 0.50000 | 0.00000 | Uiso | 1.00 |
| C23 | C | 0.42751 | 0.69229 | 0.50000 | 0.00000 | Uiso | 1.00 |
| C24 | C | 0.46127 | 0.73638 | 0.50000 | 0.00000 | Uiso | 1.00 |
| C25 | C | 0.50503 | 0.74777 | 0.50000 | 0.00000 | Uiso | 1.00 |
| C26 | C | 0.51740 | 0.71596 | 0.50000 | 0.00000 | Uiso | 1.00 |
| C27 | C | 0.48451 | 0.67202 | 0.50000 | 0.00000 | Uiso | 1.00 |
| C28 | C | 0.44060 | 0.66051 | 0.50000 | 0.00000 | Uiso | 1.00 |

---

|      |    |          |         |         |         |      |      |
|------|----|----------|---------|---------|---------|------|------|
| C29  | C  | 0.56478  | 0.73086 | 0.50000 | 0.00000 | Uiso | 1.00 |
| C30  | C  | 0.04560  | 0.35573 | 0.50000 | 0.00000 | Uiso | 1.00 |
| C31  | C  | 0.02509  | 0.31283 | 0.50000 | 0.00000 | Uiso | 1.00 |
| Cl32 | Cl | 0.19372  | 0.85911 | 0.50000 | 0.00000 | Uiso | 1.00 |
| H33  | H  | 0.93961  | 0.02192 | 0.50000 | 0.00000 | Uiso | 1.00 |
| H34  | H  | 0.87587  | 0.97229 | 0.50000 | 0.00000 | Uiso | 1.00 |
| H35  | H  | 0.91257  | 0.87224 | 0.50000 | 0.00000 | Uiso | 1.00 |
| H36  | H  | 0.83813  | 0.81803 | 0.50000 | 0.00000 | Uiso | 1.00 |
| H37  | H  | 0.80129  | 0.91713 | 0.50000 | 0.00000 | Uiso | 1.00 |
| H38  | H  | 0.74506  | 0.84473 | 0.50000 | 0.00000 | Uiso | 1.00 |
| H39  | H  | 0.76954  | 0.77379 | 0.50000 | 0.00000 | Uiso | 1.00 |
| H40  | H  | 0.56049  | 0.66981 | 0.50000 | 0.00000 | Uiso | 1.00 |
| H41  | H  | 0.39099  | 0.74467 | 0.50000 | 0.00000 | Uiso | 1.00 |
| H42  | H  | 0.45543  | 0.76331 | 0.50000 | 0.00000 | Uiso | 1.00 |
| H43  | H  | 0.52950  | 0.78204 | 0.50000 | 0.00000 | Uiso | 1.00 |
| H44  | H  | 0.49188  | 0.64594 | 0.50000 | 0.00000 | Uiso | 1.00 |
| H45  | H  | 0.41789  | 0.62621 | 0.50000 | 0.00000 | Uiso | 1.00 |
| H46  | H  | 0.58543  | 0.76542 | 0.50000 | 0.00000 | Uiso | 1.00 |
| H47  | H  | 0.03029  | 0.37560 | 0.50000 | 0.00000 | Uiso | 1.00 |
| H48  | H  | 0.99191  | 0.29314 | 0.50000 | 0.00000 | Uiso | 1.00 |
| B49  | B  | -0.61320 | 0.52804 | 0.50000 | 0.00000 | Uiso | 1.00 |
| F50  | F  | 0.36043  | 0.48254 | 0.50000 | 0.00000 | Uiso | 1.00 |
| F51  | F  | 0.42930  | 0.53351 | 0.50000 | 0.00000 | Uiso | 1.00 |
| C52  | C  | 0.28677  | 0.63384 | 0.00000 | 0.00000 | Uiso | 1.00 |
| C53  | C  | 0.30041  | 0.67853 | 0.00000 | 0.00000 | Uiso | 1.00 |
| C54  | C  | 0.20537  | 0.61013 | 0.00000 | 0.00000 | Uiso | 1.00 |
| C55  | C  | 0.23870  | 0.59914 | 0.00000 | 0.00000 | Uiso | 1.00 |
| C56  | C  | 0.22493  | 0.55409 | 0.00000 | 0.00000 | Uiso | 1.00 |
| C57  | C  | 0.18081  | 0.52220 | 0.00000 | 0.00000 | Uiso | 1.00 |

|      |    |         |         |         |         |      |      |
|------|----|---------|---------|---------|---------|------|------|
| C58  | C  | 0.14832 | 0.53385 | 0.00000 | 0.00000 | Uiso | 1.00 |
| C59  | C  | 0.16139 | 0.57820 | 0.00000 | 0.00000 | Uiso | 1.00 |
| C60  | C  | 0.10070 | 0.50174 | 0.00000 | 0.00000 | Uiso | 1.00 |
| N61  | N  | 0.96320 | 0.38943 | 0.00000 | 0.00000 | Uiso | 1.00 |
| N62  | N  | 0.03706 | 0.42682 | 0.00000 | 0.00000 | Uiso | 1.00 |
| C63  | C  | 0.00002 | 0.42970 | 0.00000 | 0.00000 | Uiso | 1.00 |
| C64  | C  | 0.08321 | 0.45826 | 0.00000 | 0.00000 | Uiso | 1.00 |
| C65  | C  | 0.91699 | 0.37498 | 0.00000 | 0.00000 | Uiso | 1.00 |
| C66  | C  | 0.69961 | 0.37814 | 0.00000 | 0.00000 | Uiso | 1.00 |
| C67  | C  | 0.71327 | 0.34708 | 0.00000 | 0.00000 | Uiso | 1.00 |
| C68  | C  | 0.76140 | 0.36048 | 0.00000 | 0.00000 | Uiso | 1.00 |
| C69  | C  | 0.79478 | 0.40481 | 0.00000 | 0.00000 | Uiso | 1.00 |
| C70  | C  | 0.83879 | 0.41684 | 0.00000 | 0.00000 | Uiso | 1.00 |
| C71  | C  | 0.85185 | 0.38553 | 0.00000 | 0.00000 | Uiso | 1.00 |
| C72  | C  | 0.81930 | 0.34140 | 0.00000 | 0.00000 | Uiso | 1.00 |
| C73  | C  | 0.77517 | 0.32920 | 0.00000 | 0.00000 | Uiso | 1.00 |
| C74  | C  | 0.89951 | 0.40101 | 0.00000 | 0.00000 | Uiso | 1.00 |
| C75  | C  | 0.38319 | 0.02301 | 0.00000 | 0.00000 | Uiso | 1.00 |
| C76  | C  | 0.35984 | 0.97849 | 0.00000 | 0.00000 | Uiso | 1.00 |
| Cl77 | Cl | 0.52072 | 0.52060 | 0.00000 | 0.00000 | Uiso | 1.00 |
| H78  | H  | 0.27653 | 0.68822 | 0.00000 | 0.00000 | Uiso | 1.00 |
| H79  | H  | 0.21174 | 0.64313 | 0.00000 | 0.00000 | Uiso | 1.00 |
| H80  | H  | 0.24725 | 0.54192 | 0.00000 | 0.00000 | Uiso | 1.00 |
| H81  | H  | 0.17299 | 0.48862 | 0.00000 | 0.00000 | Uiso | 1.00 |
| H82  | H  | 0.13734 | 0.58852 | 0.00000 | 0.00000 | Uiso | 1.00 |
| H83  | H  | 0.08016 | 0.51578 | 0.00000 | 0.00000 | Uiso | 1.00 |
| H84  | H  | 0.10458 | 0.44481 | 0.00000 | 0.00000 | Uiso | 1.00 |
| H85  | H  | 0.89537 | 0.34019 | 0.00000 | 0.00000 | Uiso | 1.00 |
| H86  | H  | 0.72351 | 0.41172 | 0.00000 | 0.00000 | Uiso | 1.00 |



|     |   |         |         |         |         |      |      |
|-----|---|---------|---------|---------|---------|------|------|
| H87 | H | 0.78839 | 0.43142 | 0.00000 | 0.00000 | Uiso | 1.00 |
| H88 | H | 0.86293 | 0.45122 | 0.00000 | 0.00000 | Uiso | 1.00 |
| H89 | H | 0.82706 | 0.31560 | 0.00000 | 0.00000 | Uiso | 1.00 |
| H90 | H | 0.75281 | 0.29471 | 0.00000 | 0.00000 | Uiso | 1.00 |
| H91 | H | 0.91995 | 0.43558 | 0.00000 | 0.00000 | Uiso | 1.00 |
| H92 | H | 0.36933 | 0.04417 | 0.00000 | 0.00000 | Uiso | 1.00 |
| H93 | H | 0.32470 | 0.95840 | 0.00000 | 0.00000 | Uiso | 1.00 |

**Table S2.** Kinetic parameters of pseudo-first-order and pseudo-second-order models for Au<sup>3+</sup> adsorption of ECUT-iCOF-5.

| Adsorbent   | $q_{e, \text{exp}} (\text{mg} \cdot \text{g}^{-1})$ | pseudo-first-order                                  |                         |        | pseudo-second-order                                 |                                                             |        |
|-------------|-----------------------------------------------------|-----------------------------------------------------|-------------------------|--------|-----------------------------------------------------|-------------------------------------------------------------|--------|
|             |                                                     | $q_{e, \text{cal}} (\text{mg} \cdot \text{g}^{-1})$ | $k_1 (\text{min}^{-1})$ | $R^2$  | $q_{e, \text{cal}} (\text{mg} \cdot \text{g}^{-1})$ | $k_2 (\text{g} \cdot \text{mg}^{-1} \cdot \text{min}^{-1})$ | $R^2$  |
| ECUT-iCOF-5 | 2326.666667                                         | 2184.6563                                           | 0.0508963               | 0.9652 | 2201.360344                                         | 0.00188                                                     | 0.9964 |

**Table S3.** A comparison in Au<sup>3+</sup> Adsorption/Extraction rate among reported materials and our case.

| Materials                      | Extraction capacity<br>mg/g | References                                         |
|--------------------------------|-----------------------------|----------------------------------------------------|
| ECUT-iCOF-5                    | 3260                        | This work                                          |
| ECUT-COF-29                    | 3714                        | Chem. Commun., 2024, 60, 4950-4953                 |
| PEIAC                          | 3078                        | Sci. Rep. 2021, 11, 17836 .                        |
| MoS-TpTa-1.5                   | 2564.8                      | Sep. Purif. Technol., 2024, 338,126599             |
| Ptriaz-CN-A                    | 2090                        | Nat. Commun. 2023, 14, 263                         |
| rGo                            | 1860                        | Nat. Commun. 2023, 13, 4472                        |
| PYTA-PATA-COF                  | 1834                        | Angew. Chem. Int. Ed. 2024, e202317015             |
| COF-HNU25                      | 1725                        | Angew. Chem. Int. Ed. 2023, e202300459             |
| COP-224                        | 1354                        | Chem. Mater., 2020 32, 12, 5343–5349               |
| COP-TPC6                       | 1157                        | Chem. Eng. J. 2023, 464, 142459                    |
| Fe <sub>3</sub> O@SiO@COF-DMSA | 1116                        | Sep. Purif. Technol. 2025, 353, 128582             |
| JNM-100                        | 954                         | Nat. Commun. 2022, 13, 7771                        |
| Tp-BTD-AA                      | 946                         | ACS Sustainable Chem. Eng. 2022, 10, 30, 9719–9731 |
| COF-V-S-β-CD                   | 820.8                       | Sep. Purif. Technol. 2024, 239, 125218             |

**Table S4.** Isotherm parameters of Langmuir and Freundlich models for Au<sup>3+</sup> adsorption of ECUT-iCOF-5.

| Adsorbent   | Langmuir model                                             |                                              |                                              |        | Freundlich model                                                        |         |        |
|-------------|------------------------------------------------------------|----------------------------------------------|----------------------------------------------|--------|-------------------------------------------------------------------------|---------|--------|
|             | $q_{e, \text{exp}}$<br>( $\text{mg} \cdot \text{g}^{-1}$ ) | $K_L$<br>( $\text{L} \cdot \text{mg}^{-1}$ ) | $q_m$<br>( $\text{mg} \cdot \text{g}^{-1}$ ) | $R^2$  | $K_F$ ( $\text{mg}^{1-1/n} \cdot \text{g}^{-1} \cdot \text{L}^{-1/n}$ ) | $1/n$   | $R^2$  |
| ECUT-iCOF-5 | 3200                                                       | 0.06527                                      | 3260                                         | 0.9651 | $1.403 \times 10^3$                                                     | -6.8493 | 0.9728 |
